# Supplementary material
Source: publisher figshare collection journal article supplement (https://acs.figshare.com/ndownloader/files/3982708)

**Figure 1.**  $^1\text{H}$  NMR spectra for compound 12

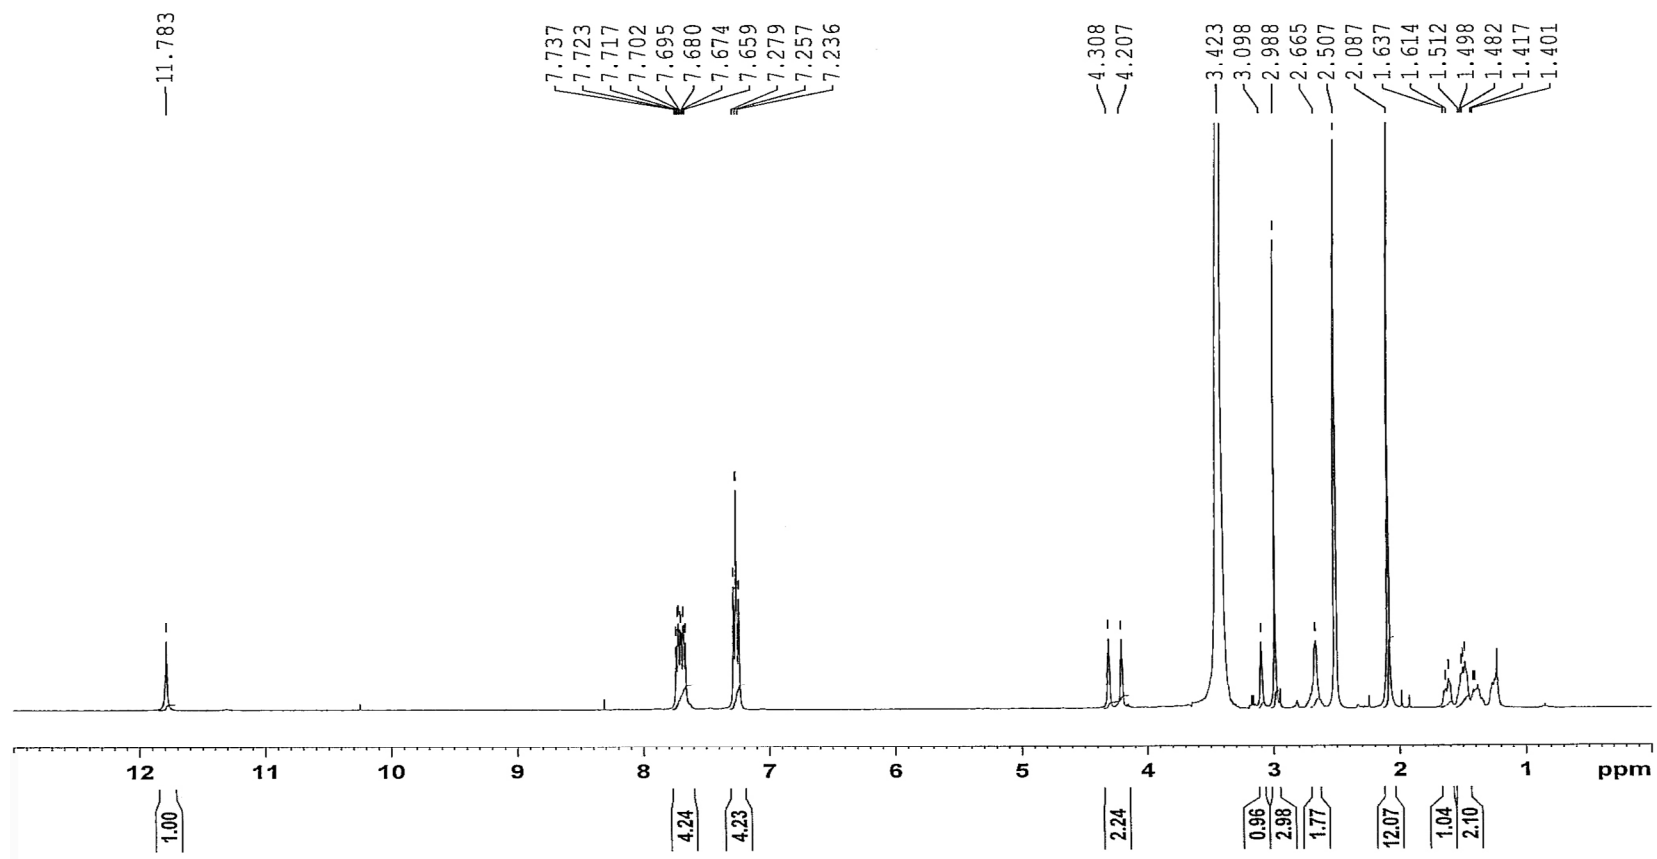

**Figure 2.**  $^{13}\text{C}$  NMR spectra for compound 12

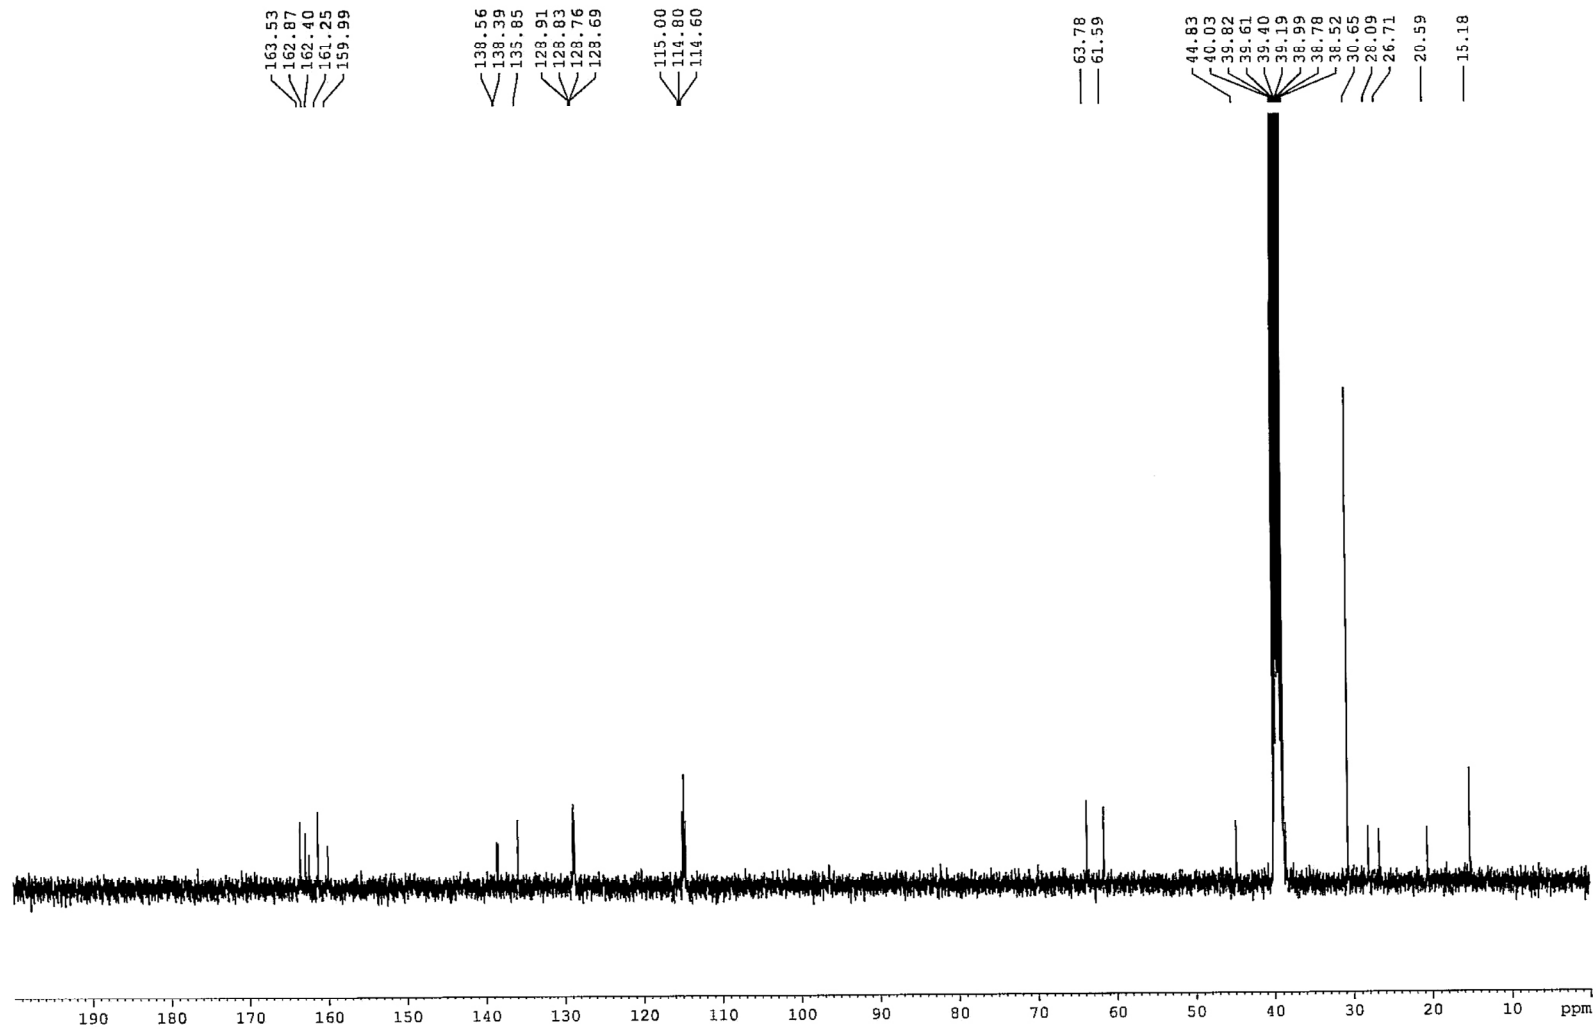

**Figure 3.**  $^1\text{HOMOCOSY}$  NMR spectra for compound 12

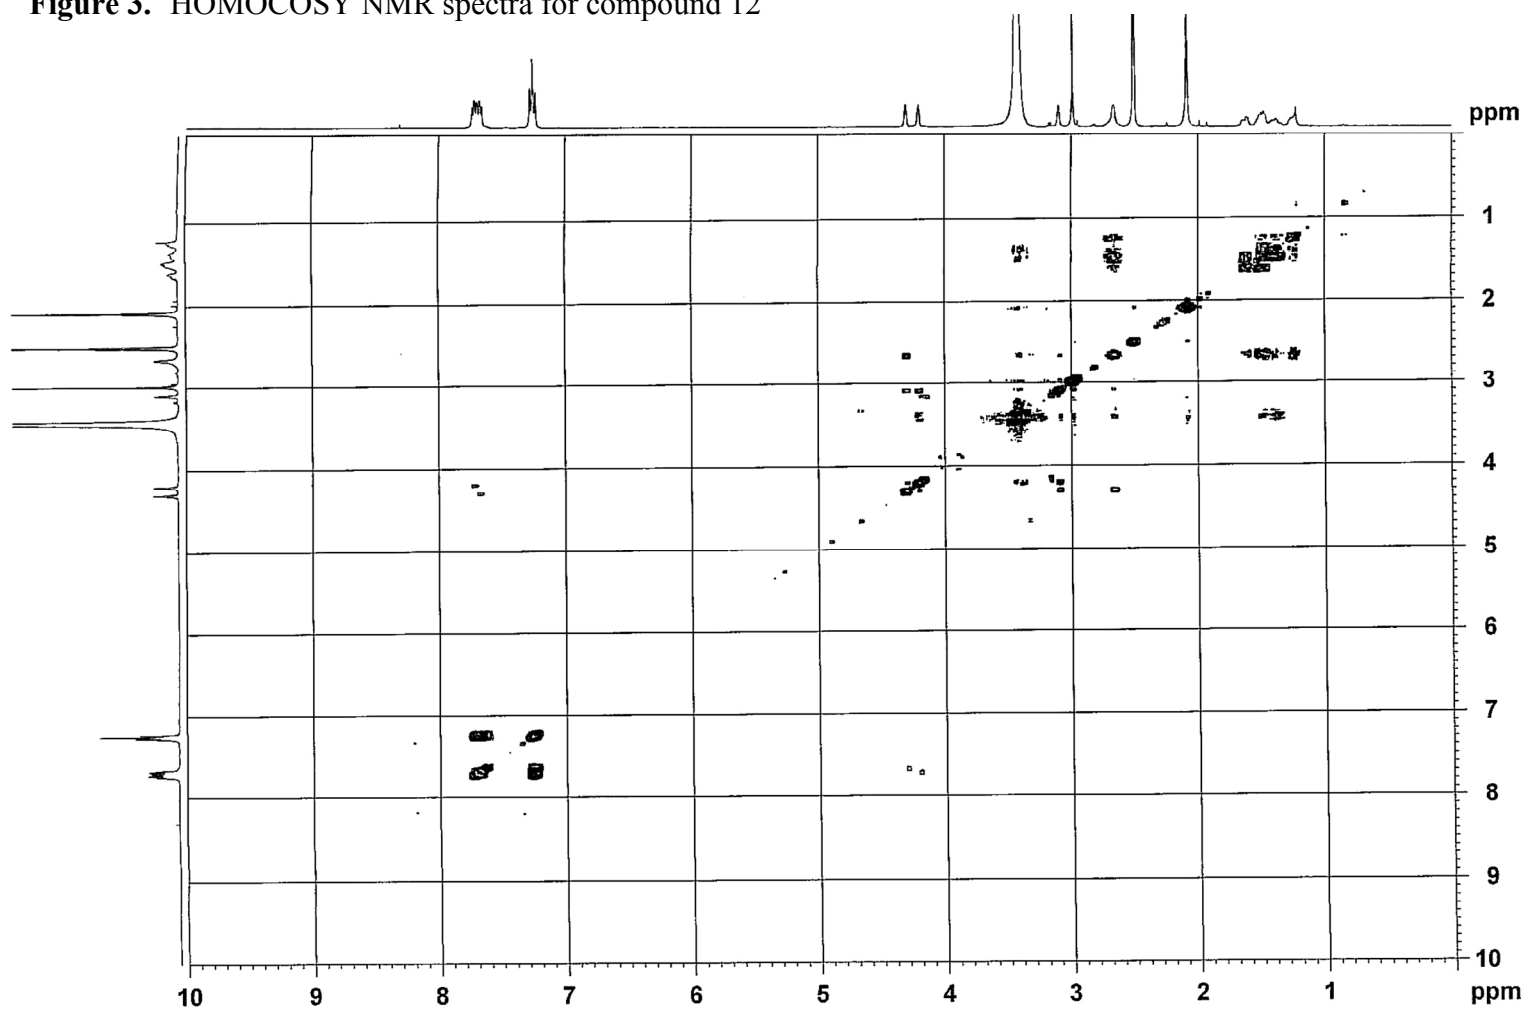

**Figure 4.** HSQC NMR spectra for compound 12

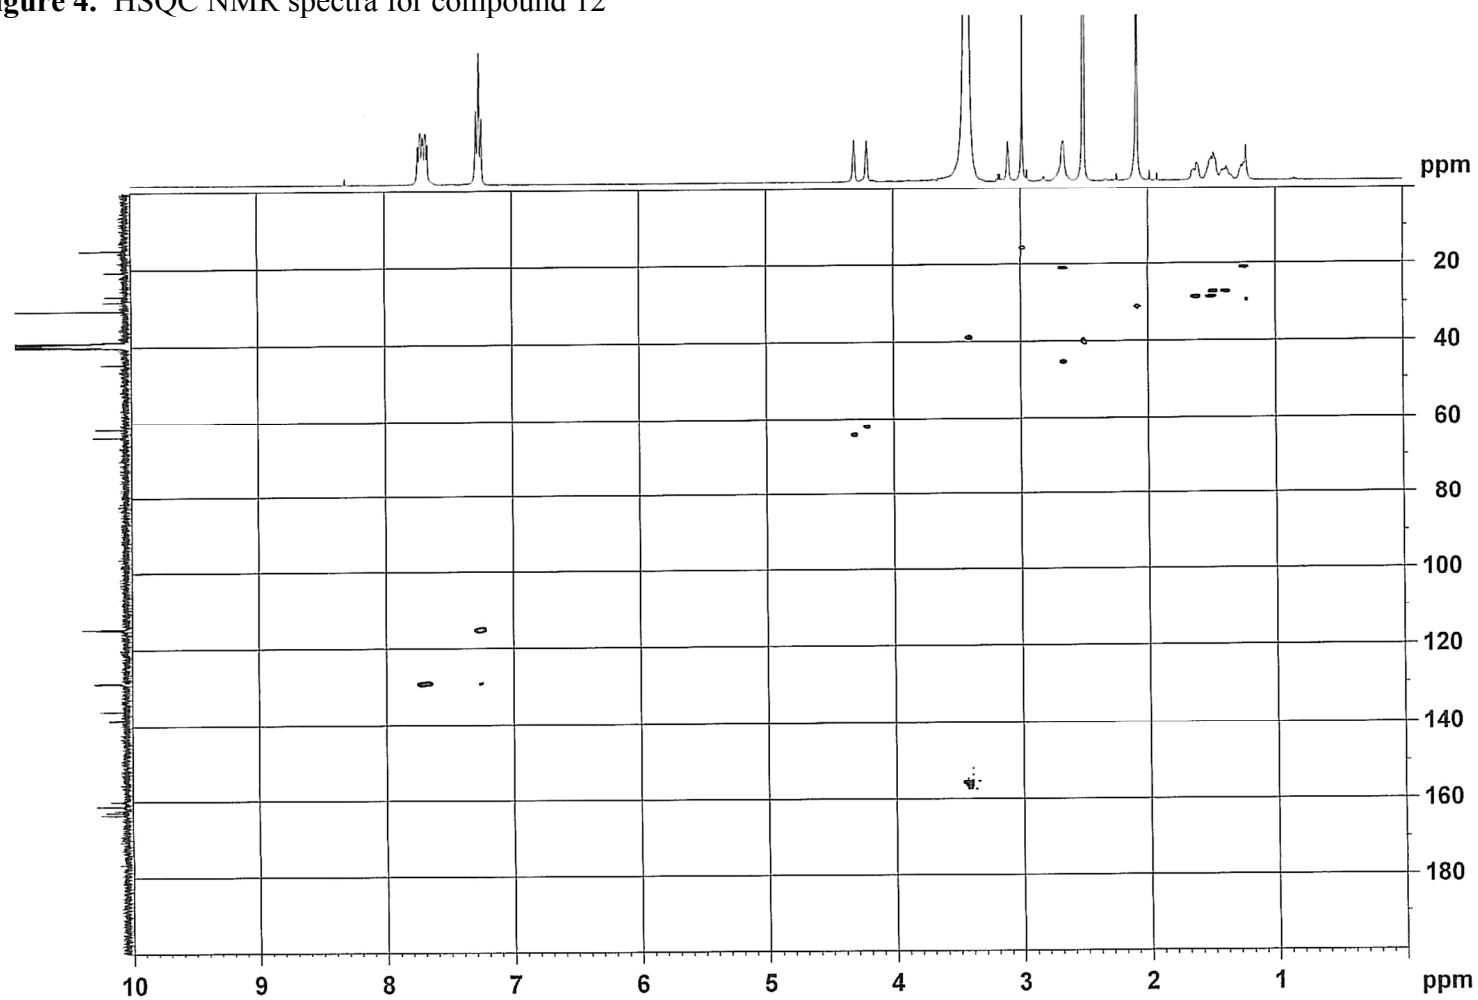

**Figure 5.** HMBC NMR spectra for compound 12

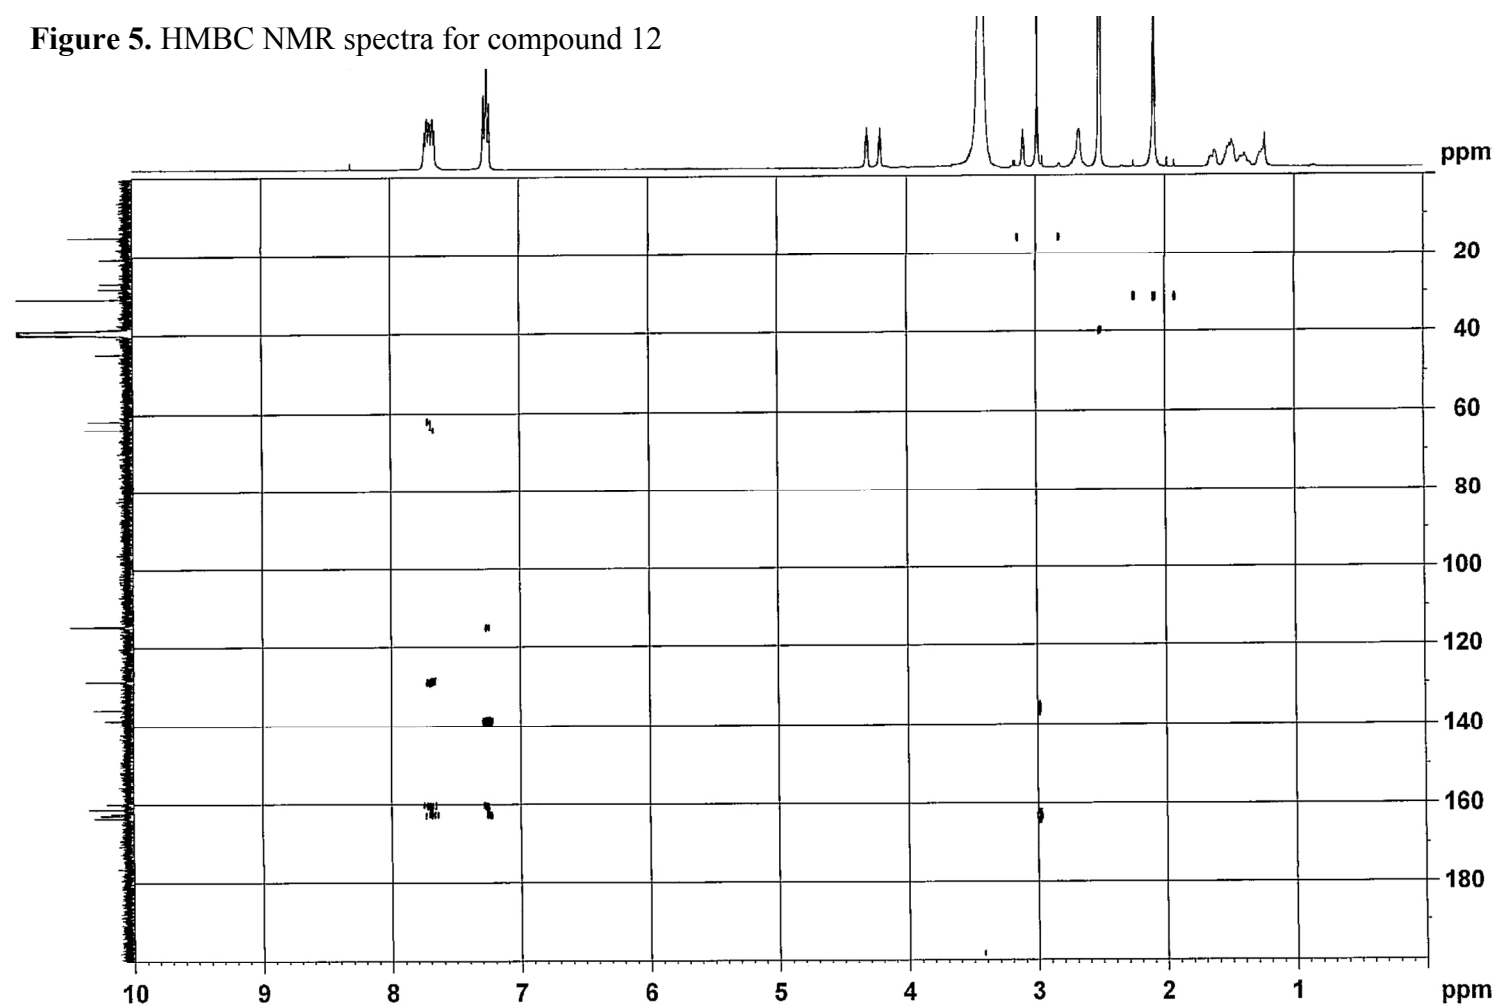

Supplement: Supplementary file 1 [file 3982708]
